# Supplementary material
Source: ML conference proceedings conference paper supplement (https://openaccess.thecvf.com/content/WACV2021/html/Lohit_Recovering_Trajectories_of_WACV_2021_paper.html)
Supplement: Supplementary file 2 [file Lohit_Recovering_Trajectories_of_WACV_2021_supplemental.zip]

Archive with 5 entries (5 files):
- 0334-supp/0334-supp.pdf
- 0334-supp/HDM_results_Train_OTP_50_Test_OTP_50.avi
- 0334-supp/HDM_results_Train_OTP_75_Test_OTP_50.avi
- 0334-supp/NTU_results_Train_OTP_50_Test_OTP_50.avi
- 0334-supp/NTU_results_Train_OTP_75_Test_OTP_50.avi
